# Supplementary material for: Evolution of Bacterial Communities, Physicochemical Changes and Sensorial Attributes of Natural Whole and Cracked Picual Table Olives During Spontaneous and Inoculated Fermentation
Source: PubMed Central journal article supplement (PMC7273852; doi:10.3389/fmicb.2020.01128), 2020-05-29
Supplement: Image_1.pdf [file Image_1.pdf]

## Supplementary Material

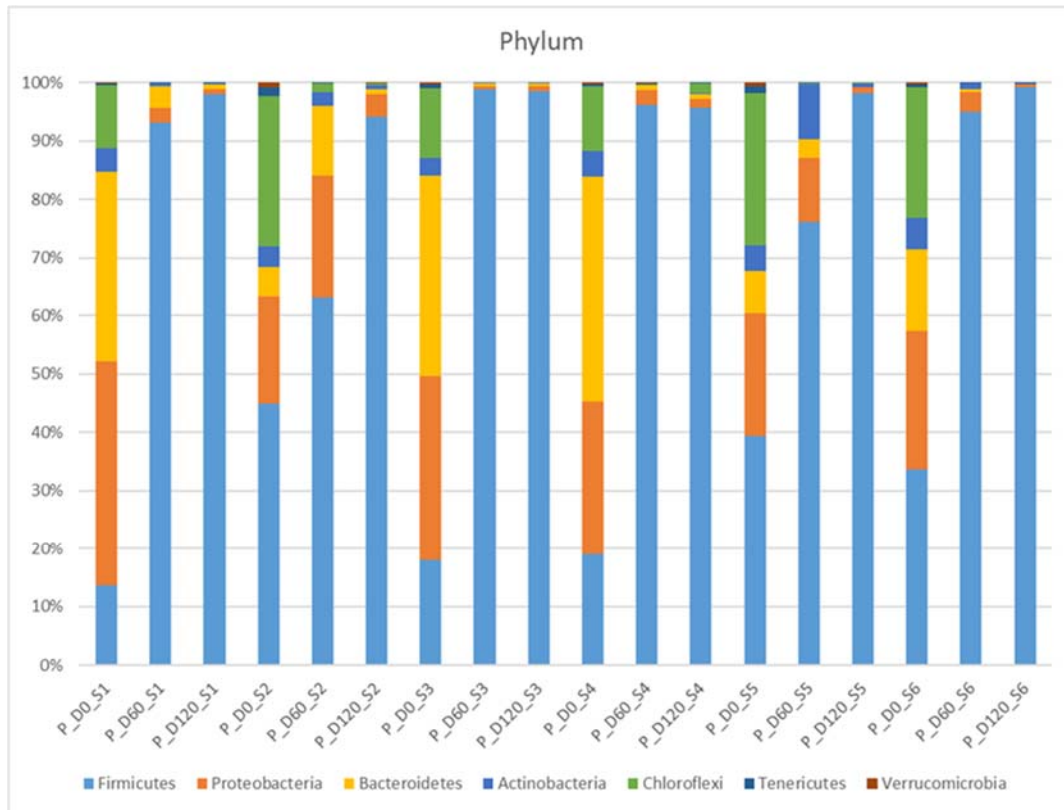

**Supplementary Figure 1.** Relative abundance of bacterial phyla in the different treatments assayed (S1-S6), obtained through metagenetic analysis of 16S rRNA gene at the initial (D0), middle (D60) and the end (D120) of fermentation process.
